# Supplementary material for: Dual-site synergistic catalysis of a single atomic Ru and tungsten compound heterojunction for enhanced alkaline hydrogen evolution
Source: Royal Society of Chemistry journal article supplement (doi:10.1039/d5ta07984e), 2026-01-01
Supplement: d5ta07984e1.pdf [file d5ta07984e1.pdf]

## Experimental section

### 1.1 Chemicals and reagents

All chemicals were purchased directly to be used without further purification. Tungsten (VI) chloride ( $\text{WCl}_6$ , 99%, Macklin), Ruthenium chloride hydrate ( $\text{RuCl}_3$ , 99.95%, Aladdin), 1,10-Phenanthroline ( $\text{C}_{12}\text{H}_8\text{N}_2$ , 99%, Aladdin), D-(+)-Glucose monohydrate ( $\text{C}_6\text{H}_{12}\text{O}_6 \cdot \text{H}_2\text{O}$ , 98% Aladdin), Nickel nitrate hexahydrate ( $\text{Ni}(\text{NO}_3)_2 \cdot 6\text{H}_2\text{O}$ , 99%, Aladdin), Iron nitrate nonahydrate ( $\text{Fe}(\text{NO}_3)_3 \cdot 9\text{H}_2\text{O}$ , 98%, Aladdin), Urea ( $(\text{NH}_2)_2\text{CO}$ , 99%, Aladdin), platinum/carbon commercial catalyst (Pt/C, 20wt%, Aladdin), Potassium hydroxide (KOH, 99.99%, Aladdin), nickel foam (NF).

### 1.2 Synthesis of catalysts.

#### 1.2.1 Synthesis of Ru- $\text{W}_2\text{N}/\text{WO}_2$ and $\text{W}_2\text{N}/\text{WO}_2$ .

Ru- $\text{W}_2\text{N}/\text{WO}_2$  is typically prepared using the co-precipitation and calcination method. First, 0.013g  $\text{RuCl}_3$ 、0.495g  $\text{WCl}_6$ 、1g  $\text{C}_{12}\text{H}_8\text{N}_2$  和 1g  $\text{C}_6\text{H}_{12}\text{O}_6$  are ultrasonically dissolved in 40 ml of deionized water in a beaker. The solution is continuously stirred for 2 hours to ensure thorough mixing. After the reaction is completed, the generated precipitate is separated from the mother liquor by centrifugation at a speed of  $7000 \text{ r min}^{-1}$  for 15 minutes. The precipitate is then washed with deionized water to remove the impurity ions adsorbed on the surface. After three repeated washings, the obtained precipitate is dried in a vacuum at  $60^\circ\text{C}$  for 12 hours. Subsequently, the precipitate is placed in a tube furnace under an Ar atmosphere. It is heated from room temperature to  $750^\circ\text{C}$  at a heating rate of  $5^\circ\text{C min}^{-1}$  and then maintained at this temperature for 2 hours. After natural cooling, a black block-shaped sample of Ru- $\text{W}_2\text{N}/\text{WO}_2$  is obtained, which is ground for later use. The synthesis process of  $\text{W}_2\text{N}/\text{WO}_2$  is similar to that of Ru- $\text{W}_2\text{N}/\text{WO}_2$ , except that  $\text{RuCl}_3$  is not introduced.

#### 1.2.2 Synthesis of NiFe LDH.

First, a solution was prepared by dissolving 0.5 mmol of  $\text{Fe}(\text{NO}_3)_3 \cdot 9\text{H}_2\text{O}$ , 0.5 mmol of  $\text{Ni}(\text{NO}_3)_2 \cdot 6\text{H}_2\text{O}$ , and 5 mmol of  $(\text{NH}_2)_2\text{CO}$  in 40 mmol of distilled water. Then, the above-mentioned solution and nickel foam were transferred into a polytetrafluoroethylene-coated autoclave and placed in a drying oven, and maintained at  $120^\circ\text{C}$  for 12 hours. After the obtained

sample was rinsed with deionized water, it was dried to obtain the final sample.

### 1.3 Materials Characterization:

The crystal structure of the catalyst was characterized via powder X-ray diffraction. (XRD, Smart Lab, 3 kW) with a Cu K $\alpha$  radiation ( $\lambda = 1.5408 \text{ \AA}$ ) source in the  $2\theta$  range of 25-85°. Sample morphology and microstructure were determined by aberration-corrected transmission electron microscope (AC-TEM, Titan Themis G2), field-emission scanning electron microscopy (SEM, Regulus8100) and transmission electron microscopy (TEM, HT7700). Surface elemental analysis was justified via x-ray photoelectron spectroscopy (XPS, Thermo Scientific ESCALAB 250Xi). The work function of all samples was measured by ultraviolet photoelectron spectroscopy (UPS, ThermoFisher Nexsa).

### 1.4 XAFS data processing

The X-ray absorption fine structure spectra (Ru K-edge and W L<sub>3</sub>-edge) were collected with Si (111) crystal monochromators at the BL14W1 beamlines at the Shanghai Synchrotron Radiation Facility (SSRF) (Shanghai, China), the data collection was carried out in transmission mode using ionization chamber for Ru foil, RuO<sub>2</sub>, WO<sub>2</sub>, WO<sub>3</sub> and W foil, and in fluorescence excitation mode using a Lytle detector for Ru-W<sub>2</sub>N/WO<sub>2</sub>-Ru, Ru-W<sub>2</sub>N/WO<sub>2</sub>-W and W<sub>2</sub>N/WO<sub>2</sub>-W. All spectra were collected in ambient conditions.

The XAFS data were processed according to the standard procedures using the Athena module implemented in the IFEFFIT software packages. The EXAFS spectra were obtained by subtracting the post-edge background from the overall absorption and then normalizing with respect to the edge-jump step. Subsequently, the  $\chi(k)$  data were Fourier transformed to real (R) space using a hanning windows ( $dk = 1.0 \text{ \AA}^{-1}$ ) to separate the EXAFS contributions from different coordination shells. To obtain the quantitative structural parameters around central atoms, least-squares curve parameter fitting was performed using the ARTEMIS module of IFEFFIT software packages.

### 1.5 Electrochemical Measurements

Dispersing 5 mg catalyst into 20  $\mu\text{L}$  Nafion solution and isopropanol solution (480  $\mu\text{L}$ ), and then sonicated for 30 minutes to form a uniform ink. Then, 20  $\mu\text{L}$  ink is dropped onto a 1\*0.8cm carbon paper (containing 0.2 mg of catalyst).

All electrochemical measurements were conducted using the electrochemical station (CHI 760E) in a standard three-electrode system at room temperature ( $\sim 25\text{ }^{\circ}\text{C}$ ). Prepared samples were applied as working electrodes. The Hg/HgO and a graphite rod were used as reference and counter electrodes, respectively. LSV was recorded in the range 0 to -0.4 V vs. RHE for HER with a scan rate of  $5\text{ mV s}^{-1}$ . To estimate the H-desorption characteristics, different scan rates of 20, 40, 60 80, and 100  $\text{mV s}^{-1}$  CV cycles were performed in the range 0 to 0.8 V vs. RHE. The electrochemical impedance spectroscopy (EIS) measurements were performed at a given potential in the frequency range of  $10^5\text{ Hz}$  to  $10^{-2}\text{ Hz}$ . To evaluate stability, chronoamperometric measurement curves were carried out at a constant current density. All potential was calibrated to the reversible hydrogen electrode (vs. RHE) according to the formula ( $E\text{ vs. RHE} = E\text{ vs. Hg/HgO} + 0.098\text{V} + 0.059\text{ pH}$ ). In-situ Raman measures: The in-situ electrolytic cell is composed of a working electrode, platinum wire as the counter electrode, and Hg/HgO as the reference electrode. The laser wavelength used for all Raman tests was 532 nm. The corresponding Raman curve is obtained by applying a voltage to achieve a stable current.

## 1.6 Computational details

The  $\text{W}_2\text{N}(111)/\text{WO}_2(101)$  and  $\text{Ru-W}_2\text{N}(111)/\text{WO}_2(101)$  surfaces were built, where the vacuum space along the z direction is set to be 20  $\text{\AA}$ , which is enough to avoid interaction between the two neighboring images. All atoms were relaxed adequately to remove the internal stress of systems. Then, the H,  $\text{H}_2\text{O}$ ,  $\text{H}_2$ ,  $\text{H}+\text{H}$ ,  $\text{OH}+\text{H}$  were absorbed on the W or Ru site. All the spin-polarized first-principles calculations were performed via the Vienna ab initio simulation package (VASP).<sup>1</sup> The ion-electron interactions were described by the projector augmented wave (PAW) method, and the generalized gradient approximation (GGA) with the Perdew-Burke-Ernzerh of (PBE) was used to treat the interaction of electronic exchange-

correlation energy.<sup>2-4</sup> The Monkhorst-Pack k-point mesh of 7x7x1 was set for all systems. The cutoff energy for plane-wave is 700 eV. The convergence threshold is 10<sup>-5</sup> eV and 1×10<sup>-3</sup> eV/Å for energy and force, respectively. The van der Waals interaction was treated by Grimme scheme (DFT-D3).<sup>5</sup> All atoms were relaxed. The transition state was also considered for the step of \*H+\*H →\*H<sub>2</sub>, and \*H+\*H<sub>2</sub>O→\*H<sub>2</sub>+\*OH.

Adsorption energy ΔE of A groups on the surface of substrates was defined as <sup>6</sup>:

$$\Delta E = E_{*A} - (E_{*} + E_A) \quad (1)$$

where \*A and \* denote the adsorption of A groups on substrates and the bare substrates, E<sub>A</sub> denotes the energy of A groups.

Free energy change ΔG of the reaction was calculated as the difference between the free energies of the initial and final states as shown below <sup>6</sup>:

$$\Delta G = \Delta E + \Delta ZPE - T\Delta S \quad (2)$$

where ΔE is the energy change between the reactant and product obtained from DFT calculations; ΔZPE is the change of zero point energy; T and ΔS denote temperature and change of entropy, respectively. In here, T = 300 K was considered.

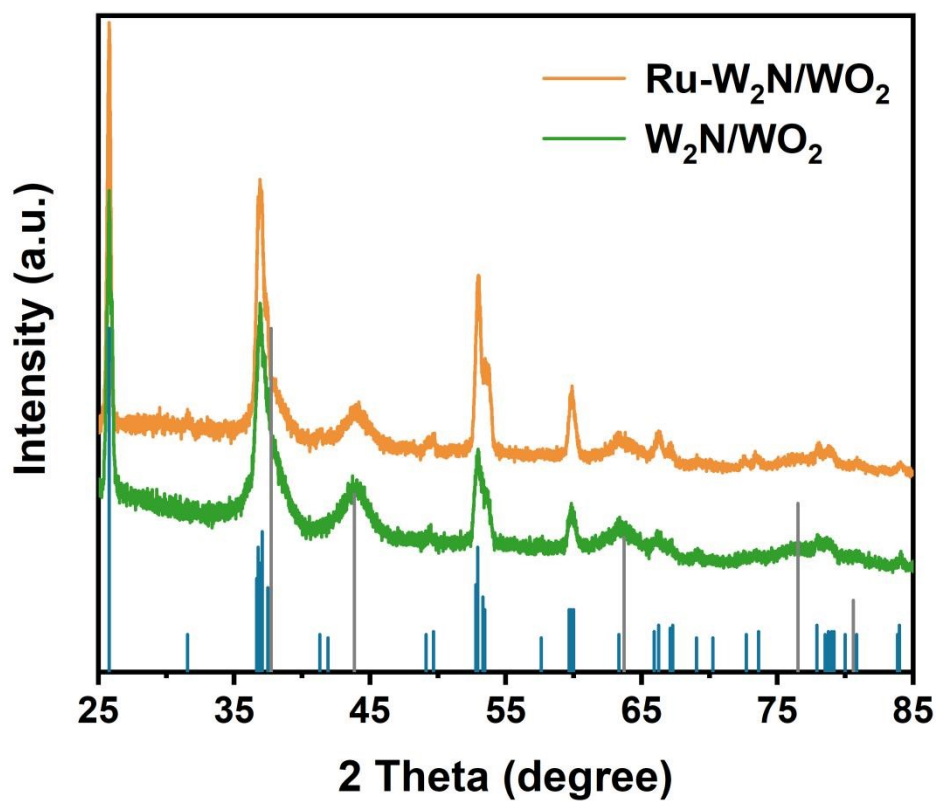

**Figure S1.** XRD patterns of prepared catalysts.

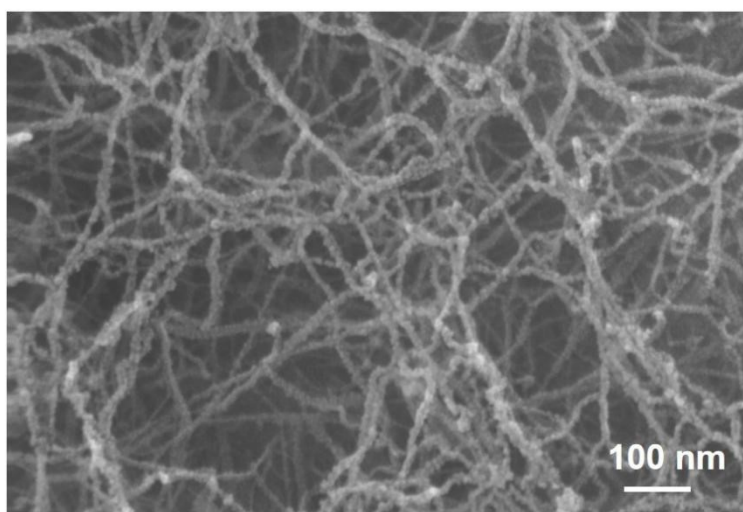

**Figure S2.** SEM image of Ru-W<sub>2</sub>N/WO<sub>2</sub>.

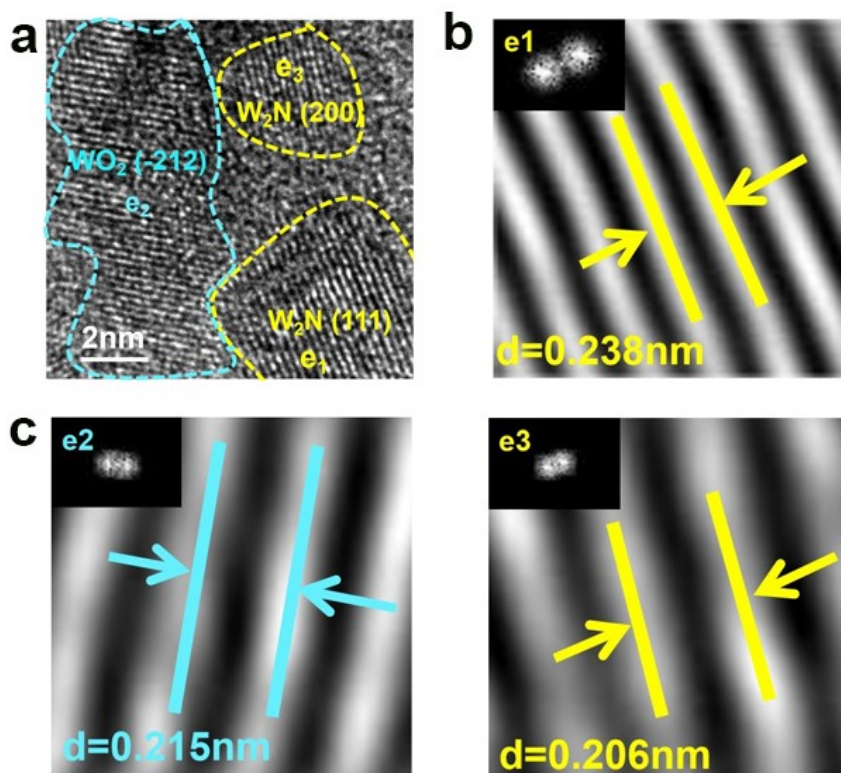

**Figure S3.** HRTEM images and the corresponding IFFT images of Ru- $W_2N/WO_2$ .

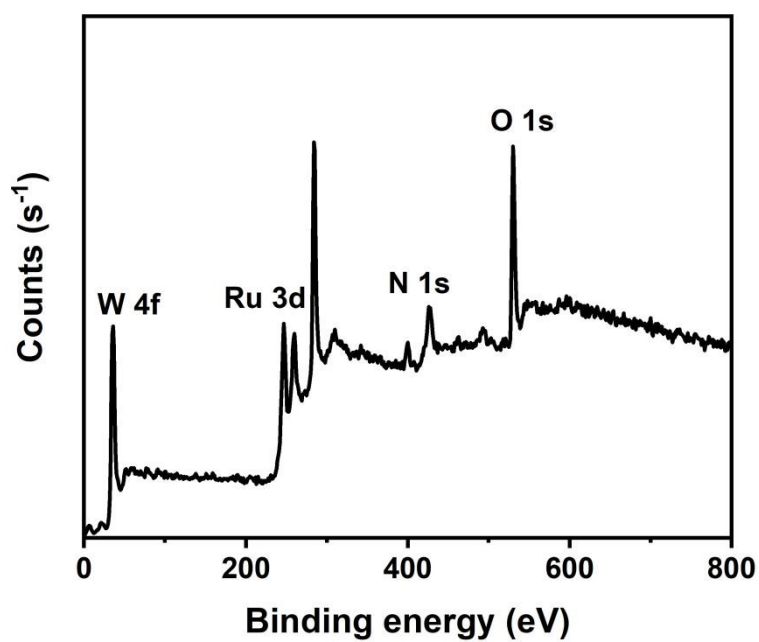

**Figure S4.** XPS survey spectrum of Ru- $W_2N/WO_2$ .

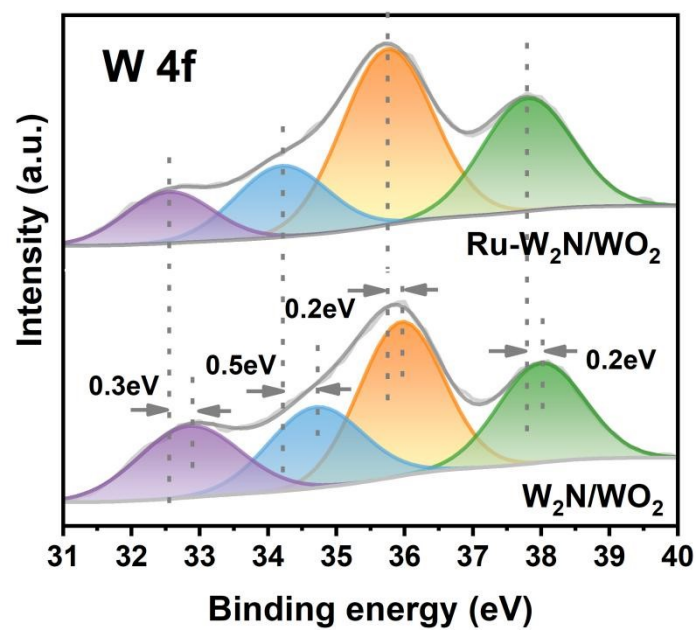

Figure S5. XPS W 4f spectra.

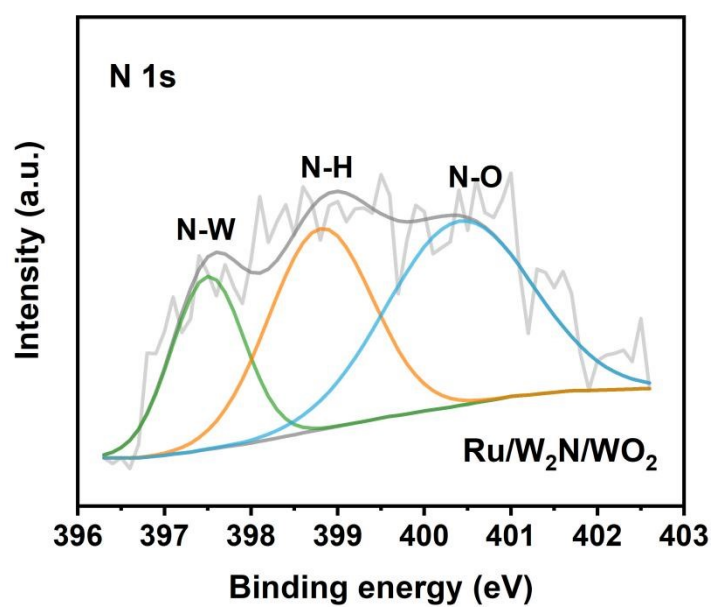

Figure S6. XPS N 1s spectra.

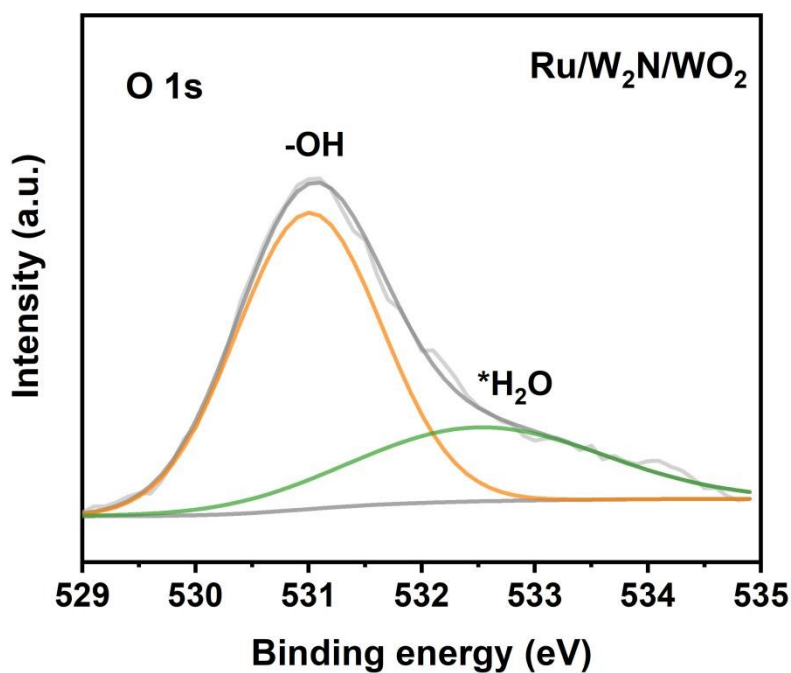

**Figure S7.** XPS O 1s spectra.

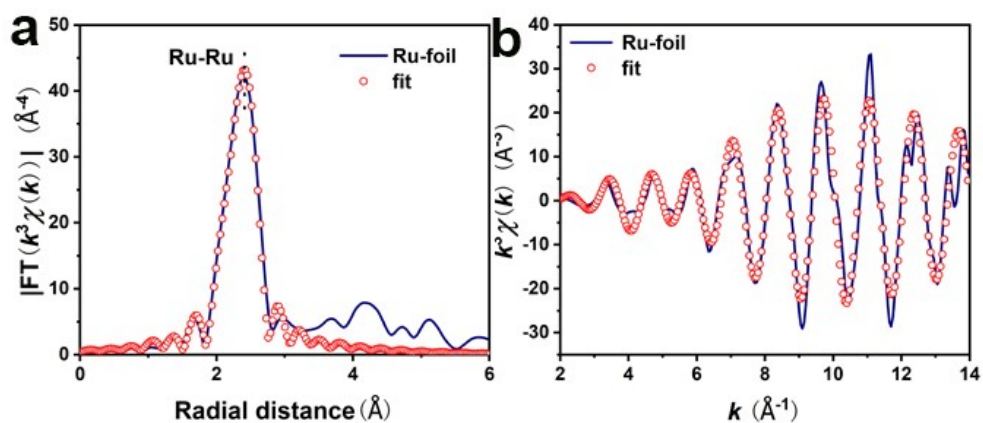

**Figure S8.** The Fourier transformed (FT)-EXAFS spectra of Ru species.



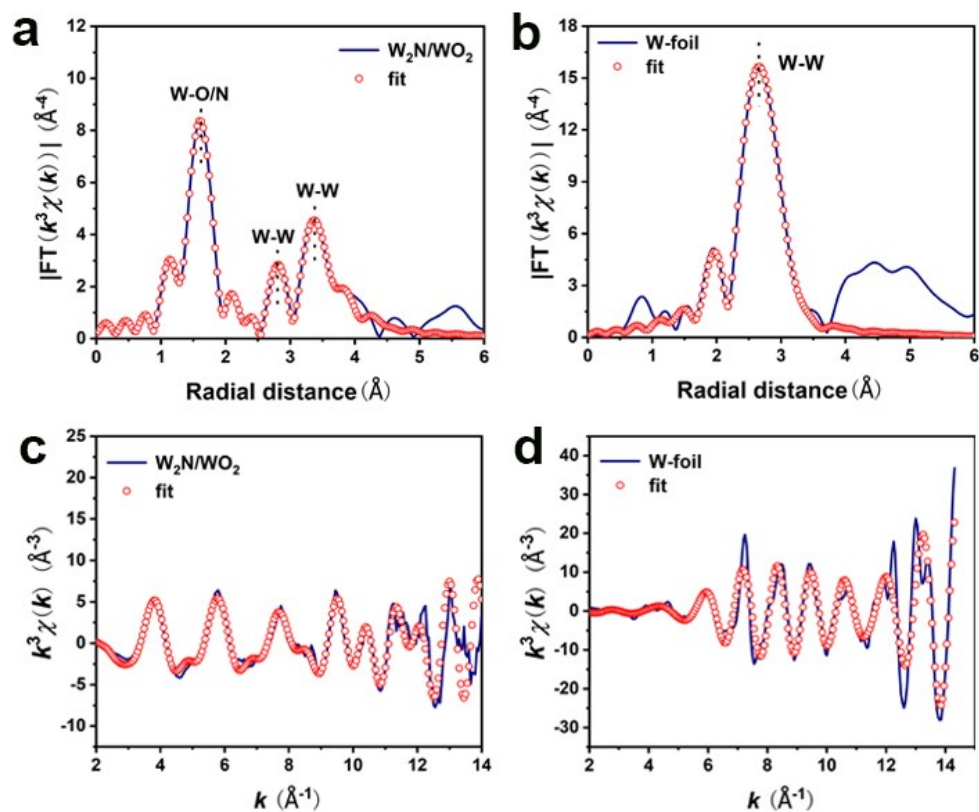

**Figure S9.** The Fourier transformed (FT)-EXAFS spectra of W species.

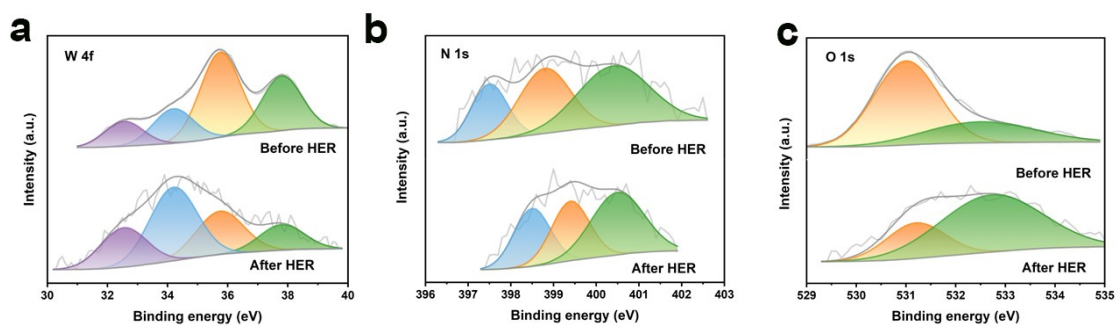

**Figure S10.** XPS spectra of Ru-W<sub>2</sub>N/WO<sub>2</sub> before and after HER test.

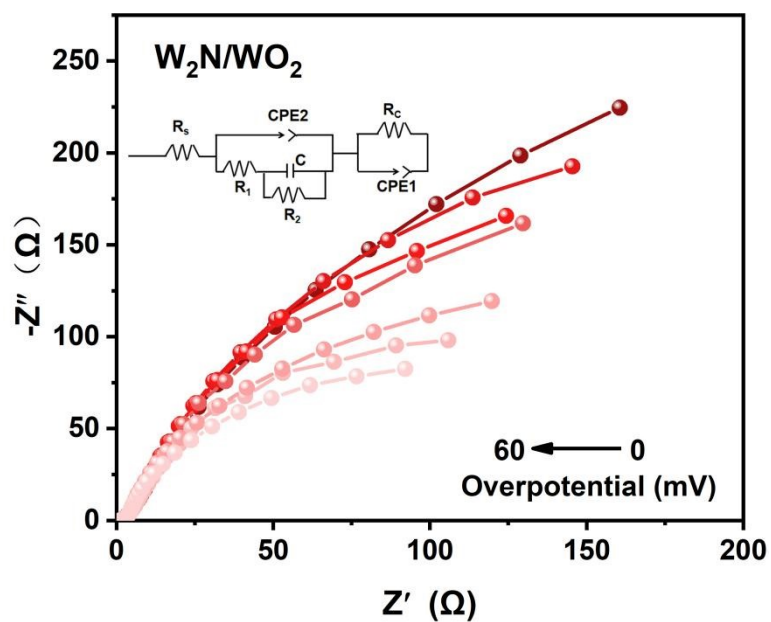

**Figure S11.** In situ EIS for HER process of  $W_2N/WO_2$ .

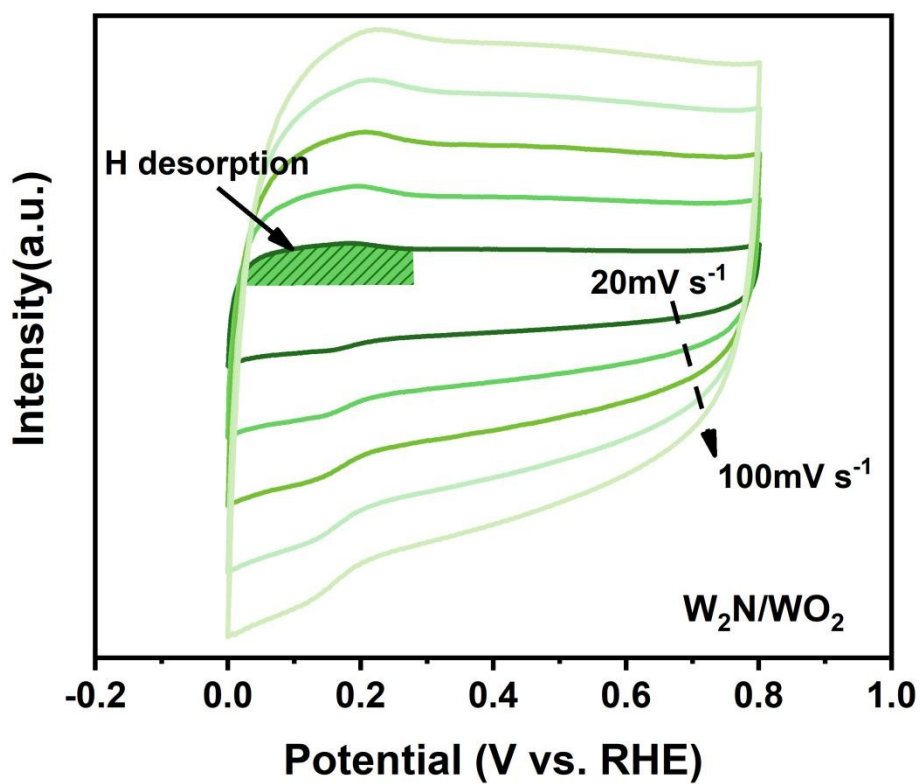

**Figure S12.** CV curves of  $W_2N/WO_2$  with the scan rate from 20 to 100  $mV s^{-1}$ .

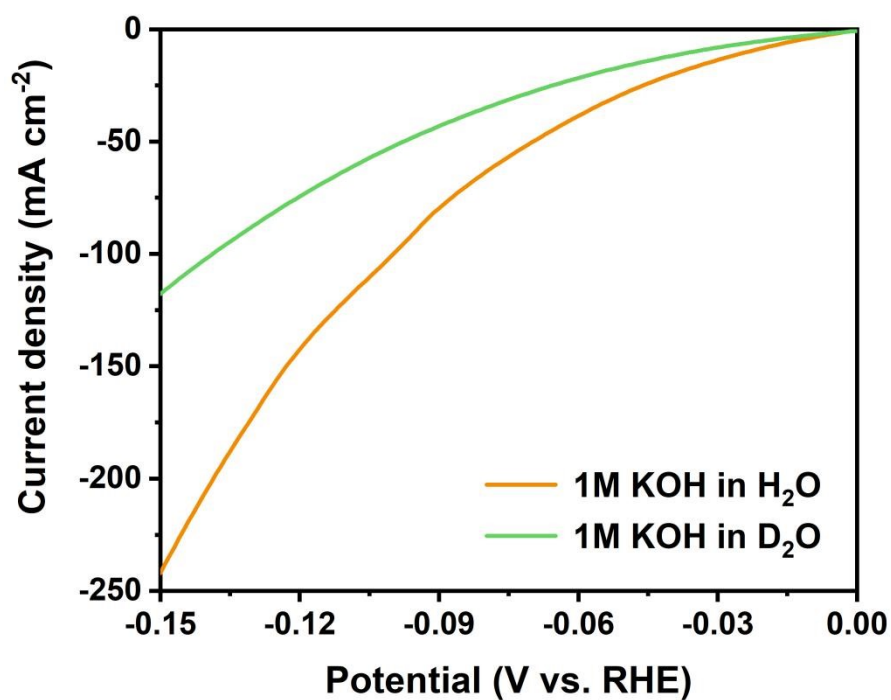

**Figure S13.** Polarization curves and KIE<sub>s</sub> of Ru-W<sub>2</sub>N/WO<sub>2</sub> in 1M KOH and KDH solution.

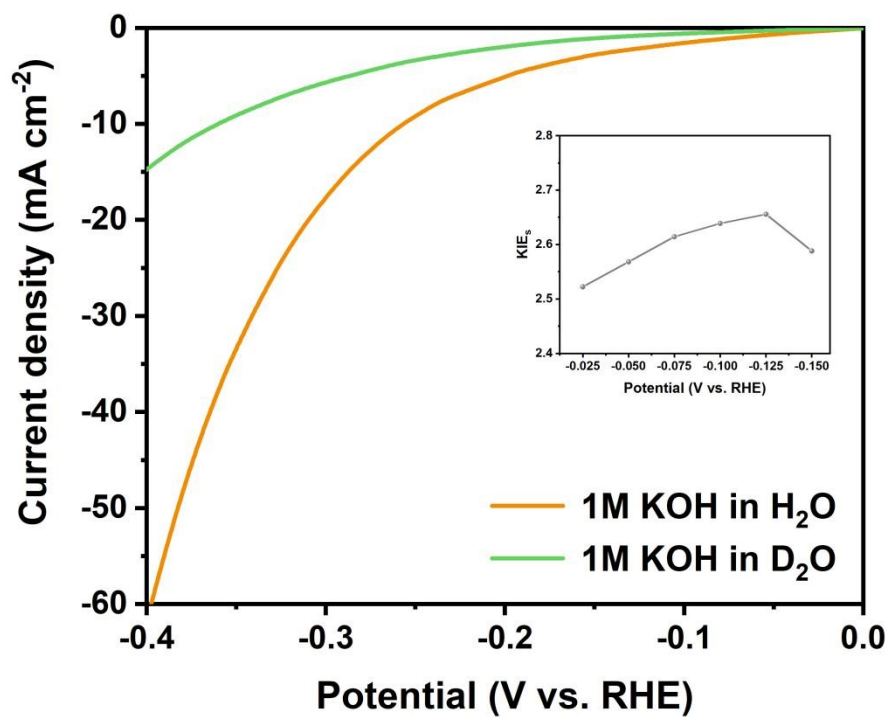

**Figure S14.** Polarization curves and KIE<sub>s</sub> of W<sub>2</sub>N/WO<sub>2</sub> in 1M KOH and KDH solution.

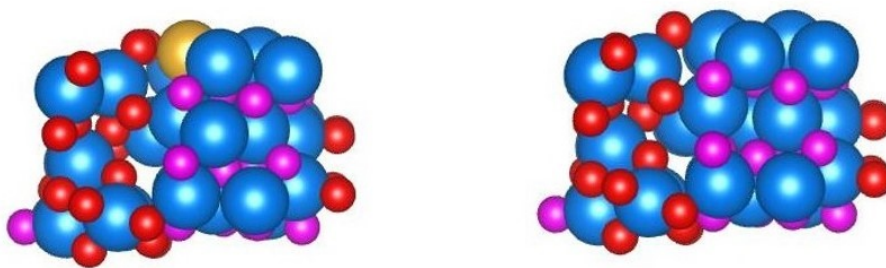

**Figure S15.** Optimized model of Ru-W<sub>2</sub>N/WO<sub>2</sub>.

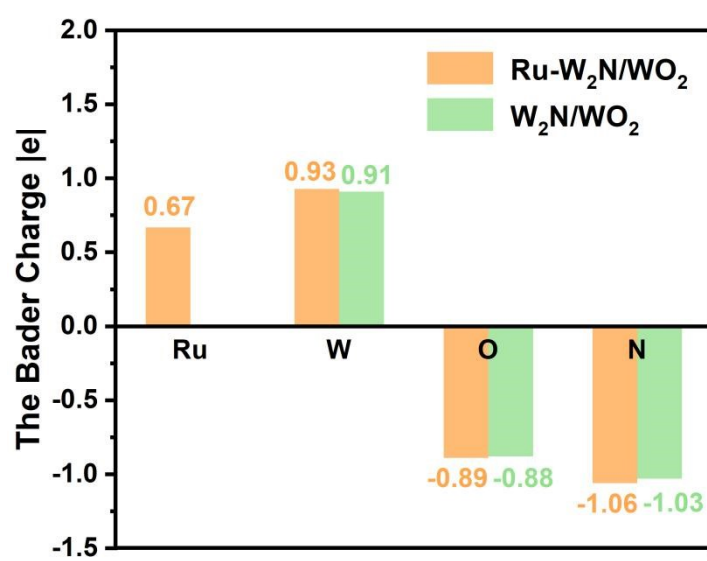

**Figure S16.** The Bader charge of Ru-W<sub>2</sub>N/WO<sub>2</sub> and W<sub>2</sub>N/WO<sub>2</sub> systems.

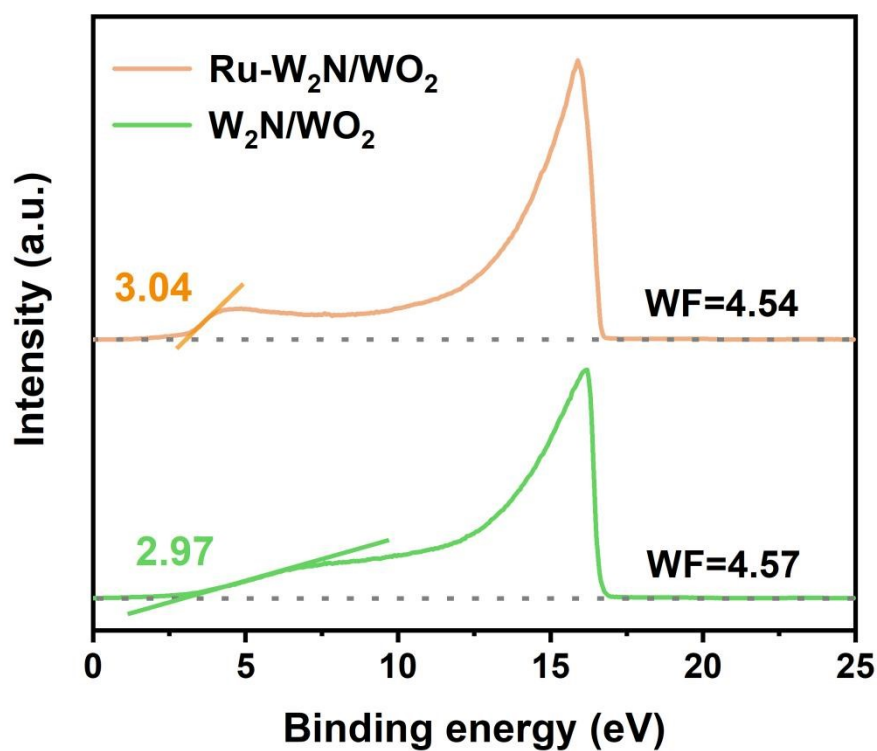

**Figure S17.**UPS spectra of Ru-W<sub>2</sub>N/WO<sub>2</sub> and W<sub>2</sub>N/WO<sub>2</sub>.

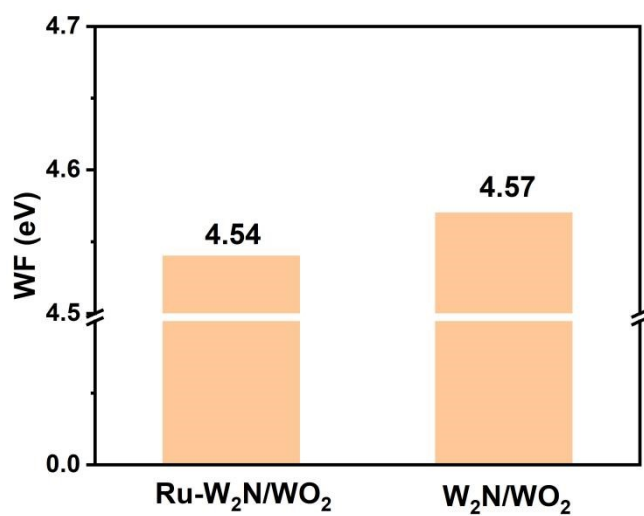

**Figure S18.**Work functions of Ru-W<sub>2</sub>N/WO<sub>2</sub> and W<sub>2</sub>N/WO<sub>2</sub>.

**Table1 ICP testing results of Ru-W<sub>2</sub>N/WO<sub>2</sub>.**

| Ru-W <sub>2</sub> N/WO <sub>2</sub> | W     | Ru   |
|-------------------------------------|-------|------|
| Metal content(wt%)                  | 68.15 | 0.86 |

**Table2 EXAFS data fitting results of Samples of Ru species.**

| Sample                                         | Path  | R(Å) <sup>b</sup> |
|------------------------------------------------|-------|-------------------|
| Ru K-edge (S <sub>0</sub> <sup>2</sup> =0.910) |       |                   |
| Ru foil                                        | Ru-Ru | 2.675±0.003       |
|                                                | Ru-N  | 1.8932±0.008      |
| Ru-W <sub>2</sub> N/WO <sub>2</sub>            | Ru-O  | 2.082±0.019       |
|                                                | Ru-W  | 3.153±0.021       |

**Table3 EXAFS data fitting results of Samples of W species.**

| Sample                                         | Path | R(Å) <sup>b</sup> |
|------------------------------------------------|------|-------------------|
| W L3-edge (S <sub>0</sub> <sup>2</sup> =0.840) |      |                   |
| W foil                                         | W-W  | 2.733±0.004       |
|                                                | W-W  | 3.147±0.007       |
|                                                | W-N  | 2.054±0.020       |
|                                                | W-O  | 2.132±0.014       |
| Ru-W <sub>2</sub> N/WO <sub>2</sub>            | W-W  | 2.956±0.023       |
|                                                | W-Ru | 3.156±0.018       |

|                                  |     |             |
|----------------------------------|-----|-------------|
| W <sub>2</sub> N/WO <sub>2</sub> | W-W | 3.622±0.011 |
|                                  | W-N | 2.010±0.011 |
|                                  | W-O | 2.123±0.017 |
|                                  | W-W | 2.963±0.012 |
|                                  | W-W | 3.570±0.019 |

**Table4 EIS value in HER progress after fitting.**

| Catalysts                               | Potential (V<br>vs.RHE) | R <sub>s</sub> (Ω) | R <sub>1</sub> (Ω) | R <sub>2</sub> (Ω) | R <sub>c</sub> (Ω) | C (F) |
|-----------------------------------------|-------------------------|--------------------|--------------------|--------------------|--------------------|-------|
| Ru-<br>W <sub>2</sub> N/WO <sub>2</sub> | 0                       | 1.73               | 4.8                | 1.5                | 11.3               | 0.125 |
|                                         | 0.01                    | 1.65               | 4                  | 1.44               | 10                 | 0.151 |
|                                         | 0.02                    | 1.74               | 3.6                | 1.36               | 7                  | 0.241 |
|                                         | 0.03                    | 1.77               | 3                  | 1.24               | 5.2                | 0.335 |
|                                         | 0.04                    | 1.84               | 2                  | 1.17               | 3.9                | 0.369 |
|                                         | 0.05                    | 1.74               | 1.61               | 1.06               | 3.86               | 0.4   |
|                                         | 0.06                    | 1.91               | 1.58               | 0.96               | 2.54               | 0.402 |
| W <sub>2</sub> N/WO <sub>2</sub>        | 0                       | 1.34               | 100                | 288                | 578                | 0.01  |
|                                         | 0.01                    | 1.28               | 97.2               | 224                | 382                | 0.032 |
|                                         | 0.02                    | 1.18               | 92                 | 171                | 422                | 0.051 |
|                                         | 0.03                    | 1.15               | 89                 | 121                | 372                | 0.061 |
|                                         | 0.04                    | 1.11               | 82                 | 96                 | 393                | 0.075 |
|                                         | 0.05                    | 1.08               | 78                 | 78                 | 238                | 0.091 |
|                                         | 0.06                    | 1.04               | 72                 | 67                 | 199                | 0.101 |

**Table5.**Performance of some reported materials and comparison with our work.

|                                          | HER       | Tafel       | Ref.                                                  |
|------------------------------------------|-----------|-------------|-------------------------------------------------------|
| <b>This work</b>                         | <b>22</b> | <b>29.1</b> |                                                       |
| ECM@Ru                                   | 83        | 59          | Advanced Energy Materials,2020, 10, 2000882.          |
| Ni <sub>5</sub> P <sub>4</sub> -Ru       | 54        | 52          | Adv. Mater. 2020, 32, 1906972                         |
| LaRuSi                                   | 72        | 68          | Angew. Chem. 2022, 134, e202206460                    |
| LaNi <sub>0.5</sub> Co <sub>0.5</sub> Ru | 43        | 70          | Angew. Chem. Int. Ed. 2024, 63, e202315340            |
| Ru NPs/TiN                               | 73        | 41.4        | Nature Commun. 2024, 15, 50691                        |
| Ru-NiPS <sub>3</sub> NSs                 | 59        | 64          | Nat Commun. 2024, 14, 6462                            |
| M-Co NPs@Ru                              | 34        | 55          | Small 2021, 17, 2105231.                              |
| Co-Ru DAS/Ru NPs/NC-4                    | 41        | 45.16       | Nano Res. 2024, 17, 3714                              |
| CoRu-BPDC                                | 37        | 73.22       | Small 2023, 19, 2301850.                              |
| Ru/NSCS                                  | 40        | 33.8        | J. Mater. Chem. A, 2023,11, 14674                     |
| W <sub>2</sub> CO <sub>x</sub> -Ru/CC    | 52        | 26.82       | Chemical Engineering Journal. 2023, 475, 146443.      |
| Ru/S–Ni <sub>2</sub> P                   | 49        | 43.1        | J. Mater. Chem. A, 2021,9, 15648                      |
| 2.5%Ru–VS <sub>2</sub> /CC               | 87        | 93          | Nanoscale, 2024,16, 11250                             |
| Ru/Co <sub>4</sub> N/NF                  | 45        | 25          | J. Mater. Chem. A, 2023,11, 22147                     |
| Co-Ru/NCN                                | 70        | 64          | Journal of Energy Chemistry. 2023, 87, 286            |
| Ru-Co <sub>2</sub> P@Ru-N-C              | 69        | 65          | Adv. Funct. Mater. 2024, 34, 2316709.                 |
| Ru-MoCoP                                 | 55        | 67          | Adv. Funct. Mater. 2024, 34, 2309330.                 |
| S-RuP@NPSC-900 p                         | 92        | 90.23       | Adv. Sci. 2020, 7, 2001526.                           |
| Ru-1T-MoS <sub>2</sub>                   | 81        | 54          | J. Mater. Chem. A, 2022,10, 21013                     |
| Ru <sub>0.10</sub> @2H-MoS <sub>2</sub>  | 51        | 64.9        | Applied Catalysis B: Environmental. 2021, 298, 120490 |
| Ru-NiCo <sub>2</sub> S <sub>4</sub>      | 32        | 41.3        | Adv. Funct. Mater. 2022, 32, 2109731.                 |
| Ru@NC (2 wt%)                            | 26        | 36          | Angew. Chem. Int. Ed., 2018, 57, 5848                 |
| RuCo@NC hybrids                          | 28        | 31          | Nat. Commun. 2017, 8, 14969                           |
| Ru-MoO <sub>2</sub>                      | 29        | 31          | J. Mater. Chem. A, 2017, 5, 5475                      |



|                                       |    |    |                                           |
|---------------------------------------|----|----|-------------------------------------------|
| Ru@CN-0.16                            | 32 | 53 | Energy Environ. Sci., 2018, 11 , 800      |
| Ru@NG-4                               | 40 | 76 | Sustainable Energy Fuels, 2017, 1, 1028   |
| RuO <sub>2</sub> /N-C                 | 40 | 44 | ACS Sustainable Chem. Eng. 2018, 6, 11529 |
| Ru <sub>2</sub> Ni <sub>2</sub> SNs/C | 40 | 23 | Nano Energy, 2018, 47, 1                  |
| Ru ND/C                               | 43 | 49 | Chem.Comm., 2018, 54, 4613                |
| CoRu@NC-2                             | 45 | 66 | Nanotechnology, 2018, 29,225403           |
| Ru <sub>2</sub> P@PNC/CC900           | 50 | 66 | ACS Appl. Energy Mater. 2018, 1, 3143     |
| Sr <sub>2</sub> RuO <sub>4</sub>      | 61 | 51 | Nat. Commun., 2019, 10, 149               |
| Anhydrous RuO <sub>2</sub> @C         | 63 | 62 | Nano Energy, 2019, 55, 49                 |
| RuPx@NPC                              | 74 | 70 | ChemSusChem, 2018, 11, 743                |
| Cu <sub>2-x</sub> S@Ru NPs            | 82 | 48 | Small, 2017, 13, 1700052                  |

**Table6 Bader charge result.**

| Bader charge                        | Ru   | W    | N     | O     |
|-------------------------------------|------|------|-------|-------|
| Ru-W <sub>2</sub> N/WO <sub>2</sub> | 0.67 | 0.93 | -0.89 | -1.06 |
| W <sub>2</sub> N/WO <sub>2</sub>    |      | 0.91 | -0.88 | -1.03 |

1. G. Kresse and D. Joubert, Phys. Rev. B 1999, 59, 1758.
2. P.E. Blochl, Phys. Rev. B: Condens. Matter., 1994, 50, 17953-17979.
3. J. P. Perdew, K. Burke and M. Ernzerhof, Phys. Rev. Lett., 1996, 77, 3865-3868.
4. J. P. Perdew, M. Ernzerhof and K. Burke, J. Chem. Phys., 1996, 105, 9982-9985.
5. S. Grimme, J. Antony, S. Ehrlich and H. Krieg, J. Chem. Phys., 2010, 132, 154104-154123.
6. H. H. Li, Y. Wu, C. Li, Y. Y. Gong, L. Y. Niu, X. J. Liu, Q. Jiang, C. Q. Sun and S. Q. Xu, Appl. Catal. B: Environ., 2019, 251, 305–312.
